# Supplementary material
Source: Springer Nature journal article supplement (https://www.springermedizin.de/resource/supplementary/12885_2013_4041_MOESM5_ESM.pdf/9464998)
Supplement: MOESM5 [file 9464998]

**Additional File 5. Top gene sets after GSEA analysis<sup>1</sup>**

| Direction after<br>BAP1 knockdown | Name                                                          | Size | ES    | NES  | NOM p-val | FDR q-val |
|-----------------------------------|---------------------------------------------------------------|------|-------|------|-----------|-----------|
| Up                                | BIOCARTA_SPRY_PATHWAY                                         | 18   | 0.719 | 1.93 | 0.002     | 0.137     |
| Up                                | NIKOLSKY_BREAST_CANCER_1Q21_AMPLICON                          | 37   | 0.605 | 1.92 | 0.000     | 0.108     |
| Up                                | SONG_TARGETS_OF_IE86_CMV_PROTEIN                              | 47   | 0.578 | 1.91 | 0.000     | 0.164     |
| Up                                | LIU_COMMON_CANCER_GENES                                       | 40   | 0.586 | 1.90 | 0.001     | 0.078     |
| Up                                | LY_AGING_OLD_DN                                               | 47   | 0.565 | 1.89 | 0.000     | 0.101     |
| Up                                | SHEPARD_BMYB_TARGETS                                          | 60   | 0.535 | 1.89 | 0.000     | 0.062     |
| Up                                | YAO_TEMPORAL_RESPONSE_TO_PROGESTERONE_CLUSTER_13              | 159  | 0.471 | 1.87 | 0.000     | 0.092     |
| Up                                | BENPORATH_PROLIFERATION                                       | 144  | 0.472 | 1.87 | 0.000     | 0.057     |
| Up                                | HU_ANGIOGENESIS_DN                                            | 30   | 0.616 | 1.86 | 0.000     | 0.048     |
| Up                                | REACTOME_TELOMERE_MAINTENANCE                                 | 75   | 0.509 | 1.85 | 0.000     | 0.229     |
| Up                                | CHEOK_RESPONSE_TO_HD_MTX_DN                                   | 24   | 0.633 | 1.84 | 0.001     | 0.055     |
| Up                                | MORI_MATURE_B_LYMPHOCYTE_DN                                   | 57   | 0.531 | 1.84 | 0.001     | 0.050     |
| Up                                | BIOCARTA_HIVNEF_PATHWAY                                       | 56   | 0.528 | 1.83 | 0.000     | 0.207     |
| Up                                | CAFFAREL_RESPONSE_TO_THC_24HR_5_DN                            | 48   | 0.539 | 1.81 | 0.001     | 0.066     |
| Up                                | FERREIRA_EWINGS_SARCOMA_UNSTABLE_VS_STABLE_UP                 | 147  | 0.454 | 1.79 | 0.000     | 0.072     |
| Up                                | CHANDRAN_METASTASIS_TOP50_UP                                  | 16   | 0.675 | 1.78 | 0.005     | 0.078     |
| Up                                | ODONNELL_TFRC_TARGETS_DN                                      | 132  | 0.453 | 1.76 | 0.000     | 0.096     |
| Up                                | BIOCARTA_RACCYCD_PATHWAY                                      | 26   | 0.592 | 1.74 | 0.001     | 0.336     |
| Up                                | REACTOME_G1_S_TRANSITION                                      | 100  | 0.457 | 1.74 | 0.000     | 0.288     |
| Up                                | CAFFAREL_RESPONSE_TO_THC_DN                                   | 26   | 0.588 | 1.73 | 0.004     | 0.118     |
| Up                                | TOMIDA_METASTASIS_UP                                          | 20   | 0.614 | 1.72 | 0.004     | 0.113     |
| Up                                | PUJANA_BREAST_CANCER_WITH_BRCA1_MUTATED_UP                    | 54   | 0.497 | 1.72 | 0.004     | 0.454     |
| Up                                | MISSIAGLIA_REGULATED_BY_METHYLATION_DN                        | 97   | 0.463 | 1.72 | 0.000     | 0.108     |
| Up                                | NIKOLSKY_BREAST_CANCER_16P13_AMPLICON                         | 116  | 0.445 | 1.72 | 0.000     | 0.104     |
| Up                                | GARGALOVIC_RESPONSE_TO_OXIDIZED_PHOSPHOLIPIDS_TURQUOISE_DN    | 52   | 0.493 | 1.72 | 0.005     | 0.093     |
| Up                                | REACTOME_E2F_MEDIATED_REGULATION_OF_DNA_REPLICATION           | 31   | 0.556 | 1.72 | 0.004     | 0.323     |
| Up                                | KOBAYASHI_EGFR_SIGNALING_24HR_DN                              | 249  | 0.414 | 1.72 | 0.000     | 0.383     |
| Up                                | ROSS_AML_OF_FAB_M7_TYPE                                       | 68   | 0.479 | 1.71 | 0.000     | 0.092     |
| Up                                | REACTOME_MRNA_SPLICING_MINOR_PATHWAY                          | 42   | 0.520 | 1.71 | 0.004     | 0.295     |
| Up                                | BHATTACHARYA_EMBRYONIC_STEM_CELL                              | 75   | 0.465 | 1.70 | 0.000     | 0.362     |
| Up                                | KEGG_SPLICEOSOME                                              | 126  | 0.441 | 1.70 | 0.000     | 0.260     |
| Up                                | TIEN_INTESTINE_PROBIOTICS_24HR_UP                             | 550  | 0.392 | 1.70 | 0.000     | 0.101     |
| Up                                | WEL_MYCN_TARGETS_WITH_E_BOX                                   | 777  | 0.385 | 1.70 | 0.000     | 0.097     |
| Up                                | ZHANG_RESPONSE_TO_CANTHARIDIN_DN                              | 60   | 0.484 | 1.69 | 0.001     | 0.352     |
| Up                                | NAKAMURA_METASTASIS_MODEL_UP                                  | 43   | 0.519 | 1.68 | 0.003     | 0.314     |
| Up                                | WINNEPENNINGCKX_MELANOMA_METASTASIS_UP                        | 157  | 0.423 | 1.68 | 0.000     | 0.286     |
| Up                                | FERRANDO_T_ALL_WITH_MLL_ENL_FUSION_DN                         | 77   | 0.457 | 1.67 | 0.001     | 0.277     |
| Up                                | REACTOME_RNA_POLYMERASE_I_PROMOTER_CLEARANCE                  | 81   | 0.459 | 1.67 | 0.003     | 0.233     |
| Up                                | AMUNDSON_GENOTOXIC_SIGNATURE                                  | 85   | 0.445 | 1.66 | 0.001     | 0.130     |
| Up                                | ST_FAS_SIGNALING_PATHWAY                                      | 59   | 0.474 | 1.65 | 0.005     | 0.226     |
| Up                                | KEGG_NUCLEOTIDE_EXCISION_REPAIR                               | 44   | 0.494 | 1.65 | 0.003     | 0.215     |
| Up                                | REACTOME_PACKAGING_OF_TELOMERE_ENDS                           | 48   | 0.496 | 1.65 | 0.004     | 0.212     |
| Up                                | ALONSO_METASTASIS_UP                                          | 156  | 0.414 | 1.64 | 0.000     | 0.291     |
| Up                                | REACTOME_VIF_MEDIATED_DEGRADATION_OF_APOBEC3G                 | 47   | 0.490 | 1.64 | 0.004     | 0.196     |
| Up                                | BLUM_RESPONSE_TO_SALIRASIB_DN                                 | 335  | 0.384 | 1.63 | 0.000     | 0.250     |
| Up                                | REACTOME_S_PHASE                                              | 102  | 0.432 | 1.63 | 0.004     | 0.204     |
| Up                                | REACTOME_SYNTHESIS_OF_DNA                                     | 88   | 0.439 | 1.63 | 0.002     | 0.195     |
| Up                                | REACTOME_PROCESSING_OF_CAPPED_INTRON_CONTAINING_PRE_MRNA      | 137  | 0.406 | 1.63 | 0.000     | 0.190     |
| Up                                | STARK_PREFRONTAL_CORTEX_22Q11_DELETION_DN                     | 435  | 0.376 | 1.62 | 0.000     | 0.144     |
| Up                                | RHODES_CANCER_META_SIGNATURE                                  | 54   | 0.462 | 1.62 | 0.005     | 0.270     |
| Up                                | PUJANA_BRCA_CENTERED_NETWORK                                  | 93   | 0.429 | 1.61 | 0.001     | 0.152     |
| Up                                | GRAHAM_NORMAL_QUIESCENT_VS_NORMAL_DIVIDING_DN                 | 87   | 0.433 | 1.61 | 0.005     | 0.148     |
| Up                                | MANALO_HYPOXIA_DN                                             | 284  | 0.383 | 1.61 | 0.000     | 0.144     |
| Up                                | KEGG_PYRIMIDINE_METABOLISM                                    | 97   | 0.431 | 1.61 | 0.004     | 0.207     |
| Up                                | REACTOME_MRNA_SPLICING                                        | 106  | 0.425 | 1.61 | 0.000     | 0.201     |
| Up                                | MARKEY_RB1_ACUTE_LOF_DN                                       | 205  | 0.391 | 1.61 | 0.001     | 0.143     |
| Up                                | REACTOME_ELONGATION_AND_PROCESSING_OF_CAPPED_TRANSCRIPTS      | 133  | 0.409 | 1.60 | 0.002     | 0.214     |
| Up                                | REACTOME_HOST_INTERACTIONS_OF_HIV_FACTORS                     | 120  | 0.413 | 1.60 | 0.001     | 0.213     |
| Up                                | ROSTY_CERVICAL_CANCER_PROLIFERATION_CLUSTER                   | 139  | 0.406 | 1.60 | 0.002     | 0.161     |
| Up                                | WONG_MITOCHONDRIA_GENE_MODULE                                 | 209  | 0.390 | 1.60 | 0.000     | 0.310     |
| Up                                | PUJANA_XPRSS_INT_NETWORK                                      | 166  | 0.396 | 1.59 | 0.000     | 0.162     |
| Up                                | KEGG_PURINE_METABOLISM                                        | 158  | 0.395 | 1.59 | 0.000     | 0.216     |
| Up                                | REACTOME_DNA_REPLICATION_PRE_INITIATION                       | 75   | 0.436 | 1.58 | 0.003     | 0.222     |
| Up                                | REACTOME_RNA_POLYMERASE_I_III_AND_MITOCHONDRIAL_TRANSCRIPTION | 119  | 0.404 | 1.57 | 0.002     | 0.217     |
| Up                                | REACTOME_FORMATION_AND_MATURATION_OF_MRNA_TRANSCRIPT          | 151  | 0.392 | 1.57 | 0.000     | 0.214     |
| Up                                | FOURNIER_ACINAR_DEVELOPMENT_LATE_2                            | 273  | 0.375 | 1.56 | 0.000     | 0.362     |
| Up                                | MUELLER_PLURINET                                              | 294  | 0.371 | 1.56 | 0.000     | 0.377     |
| Up                                | LASTOWSKA_NEUROBLASTOMA_COPY_NUMBER_UP                        | 170  | 0.385 | 1.55 | 0.001     | 0.198     |
| Up                                | SOTIRIOU_BREAST_CANCER_GRADE_1_VS_3_UP                        | 150  | 0.390 | 1.55 | 0.002     | 0.201     |
| Up                                | GRADE_COLON_AND_RECTAL_CANCER_UP                              | 221  | 0.371 | 1.55 | 0.000     | 0.389     |
| Up                                | REACTOME_AXON_GUIDANCE                                        | 159  | 0.387 | 1.55 | 0.003     | 0.208     |
| Up                                | KRIGE_RESPONSE_TO_TOSEDOSTAT_6HR_DN                           | 872  | 0.349 | 1.54 | 0.000     | 0.389     |
| Up                                | REACTOME_INFLUENZA_VIRAL_RNA_TRANSCRIPTION_AND_REPLICATION    | 100  | 0.406 | 1.53 | 0.004     | 0.212     |
| Up                                | GRAHAM_CML_DIVIDING_VS_NORMAL_QUIESCENT_UP                    | 182  | 0.379 | 1.53 | 0.001     | 0.219     |
| Up                                | REACTOME_CELL_CYCLE_MITOTIC                                   | 301  | 0.360 | 1.53 | 0.000     | 0.205     |
| Up                                | SPIELMAN_LYMPHOBLAST_EUROPEAN_VS_ASIAN_UP                     | 469  | 0.351 | 1.52 | 0.000     | 0.222     |
| Up                                | YAO_TEMPORAL_RESPONSE_TO_PROGESTERONE_CLUSTER_17              | 167  | 0.377 | 1.52 | 0.001     | 0.422     |
| Up                                | DEBIASI_APOPTOSIS_BY_REOVIRUS_INFECTION_DN                    | 223  | 0.369 | 1.52 | 0.001     | 0.412     |
| Up                                | REACTOME_TRANSCRIPTION                                        | 195  | 0.370 | 1.51 | 0.001     | 0.214     |

|      |                                                     |     |        |       |       |       |
|------|-----------------------------------------------------|-----|--------|-------|-------|-------|
| Up   | KAUFFMANN_DNA_REPAIR_GENES                          | 204 | 0.369  | 1.51  | 0.003 | 0.228 |
| Up   | WANG_CLIM2_TARGETS_DN                               | 172 | 0.371  | 1.50  | 0.003 | 0.226 |
| Up   | KRIGE_RESPONSE_TO_TOSEDOSTAT_24HR_DN                | 967 | 0.338  | 1.50  | 0.000 | 0.412 |
| Up   | GRADE_COLON_CANCER_UP                               | 712 | 0.341  | 1.50  | 0.000 | 0.412 |
| Up   | LIU_SOX4_TARGETS_DN                                 | 303 | 0.354  | 1.50  | 0.000 | 0.234 |
| Up   | GOLDRATH_ANTIGEN_RESPONSE                           | 315 | 0.349  | 1.49  | 0.001 | 0.405 |
| Up   | BUYTAERT_PHOTODYNAMIC_THERAPY_STRESS_DN             | 624 | 0.339  | 1.49  | 0.000 | 0.244 |
| Up   | BENPORATH_MYC_MAX_TARGETS                           | 762 | 0.337  | 1.48  | 0.000 | 0.247 |
| Up   | PUJANA_BRCA2_PCC_NETWORK                            | 416 | 0.342  | 1.47  | 0.001 | 0.253 |
| Up   | BERENJENO_TRANSFORMED_BY_RHOA_UP                    | 489 | 0.336  | 1.46  | 0.000 | 0.262 |
| Up   | BASAKI_YBX1_TARGETS_UP                              | 287 | 0.346  | 1.46  | 0.000 | 0.254 |
| Up   | NAKAMURA_TUMOR_ZONE_PERIPHERAL_VS_CENTRAL_UP        | 276 | 0.346  | 1.45  | 0.003 | 0.265 |
| Up   | NUYTEN_EZH2_TARGETS_DN                              | 914 | 0.327  | 1.44  | 0.000 | 0.264 |
| Up   | REACTOME_GENE_EXPRESSION                            | 423 | 0.331  | 1.43  | 0.000 | 0.276 |
| Up   | PUJANA_CHEK2_PCC_NETWORK                            | 758 | 0.320  | 1.42  | 0.000 | 0.292 |
| Up   | BENPORATH_ES_1                                      | 372 | 0.331  | 1.41  | 0.002 | 0.302 |
| Up   | GARY_CD5_TARGETS_DN                                 | 422 | 0.329  | 1.41  | 0.000 | 0.299 |
| Up   | NIKOLSKY_BREAST_CANCER_17Q21_Q25_AMPLICON           | 330 | 0.335  | 1.41  | 0.001 | 0.300 |
| Up   | BORCZUK_MALIGNANT_MESOTHELIOMA_UP                   | 298 | 0.336  | 1.41  | 0.002 | 0.300 |
| Up   | MOOTHA_HUMAN_MITODB_6_2002                          | 421 | 0.326  | 1.41  | 0.002 | 0.460 |
| Up   | HORIUCHI_WTAP_TARGETS_DN                            | 299 | 0.333  | 1.40  | 0.002 | 0.312 |
| Up   | BENPORATH_CYCLING_GENES                             | 638 | 0.319  | 1.40  | 0.000 | 0.310 |
| Up   | GINESTIER_BREAST_CANCER_ZNF217_AMPLIFIED_DN         | 316 | 0.327  | 1.39  | 0.004 | 0.311 |
| Up   | MULLIGHAN_MLL_SIGNATURE_1_UP                        | 372 | 0.324  | 1.39  | 0.002 | 0.309 |
| Up   | BLALOCK_ALZHEIMERS_DISEASE_INCIPENT_UP              | 383 | 0.323  | 1.38  | 0.003 | 0.471 |
| Up   | LINDGREN_BLADDER_CANCER_CLUSTER_1_DN                | 369 | 0.319  | 1.37  | 0.003 | 0.316 |
| Up   | ZHOU_INFLAMMATORY_RESPONSE_LIVE_DN                  | 365 | 0.318  | 1.36  | 0.003 | 0.315 |
| Up   | MILI_PSEUDOPODIA_HAPTOTAXIS_UP                      | 457 | 0.315  | 1.36  | 0.003 | 0.468 |
| Up   | ZHOU_INFLAMMATORY_RESPONSE_LPS_DN                   | 365 | 0.318  | 1.36  | 0.005 | 0.314 |
| Up   | SHEDDEN_LUNG_CANCER_POOR_SURVIVAL_A6                | 451 | 0.315  | 1.35  | 0.002 | 0.473 |
| Up   | KIM_WT1_TARGETS_DN                                  | 448 | 0.311  | 1.34  | 0.001 | 0.328 |
| Up   | SHEN_SMARCA2_TARGETS_UP                             | 414 | 0.309  | 1.33  | 0.005 | 0.338 |
| Up   | RODRIGUES_THYROID_CARINOMA_POORLY_DIFFERENTIATED_UP | 611 | 0.301  | 1.32  | 0.005 | 0.350 |
| Up   | ACEVEDO_LIVER_TUMOR_VS_NORMAL_ADJACENT_TISSUE_UP    | 852 | 0.299  | 1.32  | 0.000 | 0.524 |
| Up   | MILI_PSEUDOPODIA_HAPTOTAXIS_DN                      | 606 | 0.295  | 1.30  | 0.002 | 0.529 |
| Up   | BENPORATH_NANOG_TARGETS                             | 962 | 0.278  | 1.23  | 0.005 | 0.468 |
| Down | MASSARWEH_TAMOXIFEN_RESISTANCE_UP                   | 555 | -0.202 | -1.12 | 0.000 | 0.595 |
| Down | GOZGIT_ESR1_TARGETS_DN                              | 731 | -0.201 | -1.14 | 0.000 | 0.529 |
| Down | STEIN_ESRRA_TARGETS                                 | 518 | -0.207 | -1.15 | 0.000 | 0.561 |
| Down | SATO_SILENCED_BY_METHYLATION_IN_PANCREATIC_CANCER_1 | 408 | -0.212 | -1.16 | 0.000 | 0.565 |
| Down | KRIGE_RESPONSE_TO_TOSEDOSTAT_24HR_UP                | 739 | -0.209 | -1.16 | 0.000 | 0.570 |
| Down | NUYTEN_EZH2_TARGETS_UP                              | 973 | -0.206 | -1.16 | 0.000 | 0.551 |
| Down | ENK_UV_RESPONSE_EPIDERMIS_DN                        | 505 | -0.216 | -1.22 | 0.000 | 0.518 |
| Down | CREIGHTON_ENDOCRINE_THERAPY_RESISTANCE_3            | 693 | -0.213 | -1.23 | 0.000 | 0.521 |
| Down | ONDER_CDH1_TARGETS_2_DN                             | 456 | -0.230 | -1.27 | 0.000 | 0.463 |
| Down | MCBRYAN_PUBERTAL_BREAST_6_7WK_UP                    | 176 | -0.262 | -1.30 | 0.000 | 0.461 |
| Down | ACEVEDO_LIVER_CANCER_DN                             | 529 | -0.243 | -1.33 | 0.000 | 0.437 |
| Down | GARY_CD5_TARGETS_UP                                 | 460 | -0.239 | -1.34 | 0.000 | 0.428 |
| Down | KAAB_HEART_ATRIUM_VS_VENTRICLE_DN                   | 260 | -0.254 | -1.35 | 0.000 | 0.417 |
| Down | BLUM_RESPONSE_TO_SALIRASIB_UP                       | 244 | -0.269 | -1.36 | 0.000 | 0.413 |
| Down | VANTVEER_BREAST_CANCER_ESR1_UP                      | 139 | -0.298 | -1.44 | 0.000 | 0.411 |
| Down | IWANAGA_CARCINOGENESIS_BY_KRAS_UP                   | 147 | -0.295 | -1.44 | 0.000 | 0.448 |
| Down | BROWNE_HCMV_INFECTION_18HR_UP                       | 175 | -0.288 | -1.45 | 0.000 | 0.458 |
| Down | KEGG_CELL_ADHESION_MOLECULES_CAMS                   | 134 | -0.298 | -1.46 | 0.000 | 0.428 |
| Down | BHATI_G2M_ARREST_BY_2METHOXYESTRADIOL_DN            | 124 | -0.312 | -1.46 | 0.000 | 0.475 |
| Down | SEKI_INFLAMMATORY_RESPONSE_LPS_UP                   | 74  | -0.339 | -1.48 | 0.004 | 0.508 |
| Down | AMIT_EGF_RESPONSE_120_HELA                          | 65  | -0.358 | -1.52 | 0.000 | 0.326 |
| Down | KIM_WT1_TARGETS_12HR_UP                             | 156 | -0.306 | -1.53 | 0.000 | 0.333 |
| Down | KEGG_GLYCOLYSIS_GLUconeogenesis                     | 62  | -0.368 | -1.54 | 0.005 | 0.368 |
| Down | MAHAJAN_RESPONSE_TO_IL1A_DN                         | 62  | -0.366 | -1.57 | 0.005 | 0.426 |
| Down | REACTOME_TRNA_AMINOACYLATION                        | 39  | -0.421 | -1.59 | 0.004 | 0.300 |
| Down | ROSS_ACUTE_MYELOID_LEUKEMIA_CBF                     | 81  | -0.379 | -1.64 | 0.000 | 0.191 |
| Down | SAGIV_CD24_TARGETS_DN                               | 45  | -0.425 | -1.64 | 0.004 | 0.362 |
| Down | RORIE_TARGETS_OF_EWSR1_FLI1_FUSION_UP               | 25  | -0.480 | -1.69 | 0.000 | 0.340 |
| Down | REACTOME_METABOLISM_OF_AMINO_ACIDS                  | 162 | -0.353 | -1.73 | 0.000 | 0.188 |
| Down | BASSO_CD40_SIGNALING_UP                             | 101 | -0.374 | -1.73 | 0.000 | 0.314 |
| Down | GRABARCZYK_BCL11B_TARGETS_DN                        | 54  | -0.437 | -1.77 | 0.000 | 0.151 |
| Down | YAO_TEMPORAL_RESPONSE_TO_PROGESTERONE_CLUSTER_6     | 65  | -0.427 | -1.79 | 0.000 | 0.247 |
| Down | REACTOME_CYTOSOLIC_TRNA_AMINOACYLATION              | 22  | -0.558 | -1.84 | 0.000 | 0.120 |
| Down | GESERICK_TERT_TARGETS_DN                            | 19  | -0.587 | -1.85 | 0.000 | 0.104 |
| Down | HEIDENBLAD_AMPLIFIED_IN_PANCREATIC_CANCER           | 31  | -0.516 | -1.87 | 0.000 | 0.114 |
| Down | KEGG_ARGININE_AND_PROLINE_METABOLISM                | 54  | -0.461 | -1.87 | 0.000 | 0.119 |
| Down | TIEN_INTESTINE_PROBIOTICS_24HR_DN                   | 206 | -0.369 | -1.92 | 0.000 | 0.100 |
| Down | HOOI_ST7_TARGETS_UP                                 | 87  | -0.431 | -1.92 | 0.000 | 0.147 |
| Down | WEBER_METHYLATED_HCP_IN_FIBROBLAST_DN               | 30  | -0.533 | -1.92 | 0.003 | 0.140 |
| Down | KRIGE_AMINO_ACID_DEPRIVATION                        | 26  | -0.583 | -2.03 | 0.000 | 0.106 |
| Down | MAHADEVAN_RESPONSE_TO_MP470_DN                      | 16  | -0.691 | -2.08 | 0.003 | 0.049 |
| Down | REACTOME_BRANCHED_CHAIN_AMINO_ACID_CATABOLISM       | 17  | -0.717 | -2.15 | 0.000 | 0.005 |
| Down | KEGG_VALINE_LEUCINE_AND_ISOLEUCINE_DEGRADATION      | 44  | -0.564 | -2.17 | 0.000 | 0.009 |

<sup>1</sup>Gene sets with a nominal P-value $\leq$ 0.005
